# Supplementary material for: Accumulation of physically protected organic carbon promoted biological activity in macro-aggregates of rice soils under long term rice cultivation
Source: Copernicus journal article supplement (doi:10.5194/bg-2016-40), 2016-04-25
Supplement: Supplementary file 1 [file bg-2016-40-supplement.pdf]

### **Supplement figure captions**

**Fig. S1** Correlation of total DNA content to organic carbon (a), total N (b) and labile carbon (c) of the size fractions of soil aggregates.

**Fig. S2** Correlation between SOC and fungal gene abundance of soil aggregates in different size fractions.

**Fig. S3** Correlation of normalized enzyme activity with organic carbon content in size fractions of soil aggregates of the studied chronosequence.

**Fig. S4** Correlation of soil respiration quotient with total DNA (a) and labile carbon content of size fractions of soil aggregates over the chronosequence. (▲: the samples from tidal marsh soil. ●: the samples from rice soils)

Supplementary Material: Supplement Figures

Fig. S1.

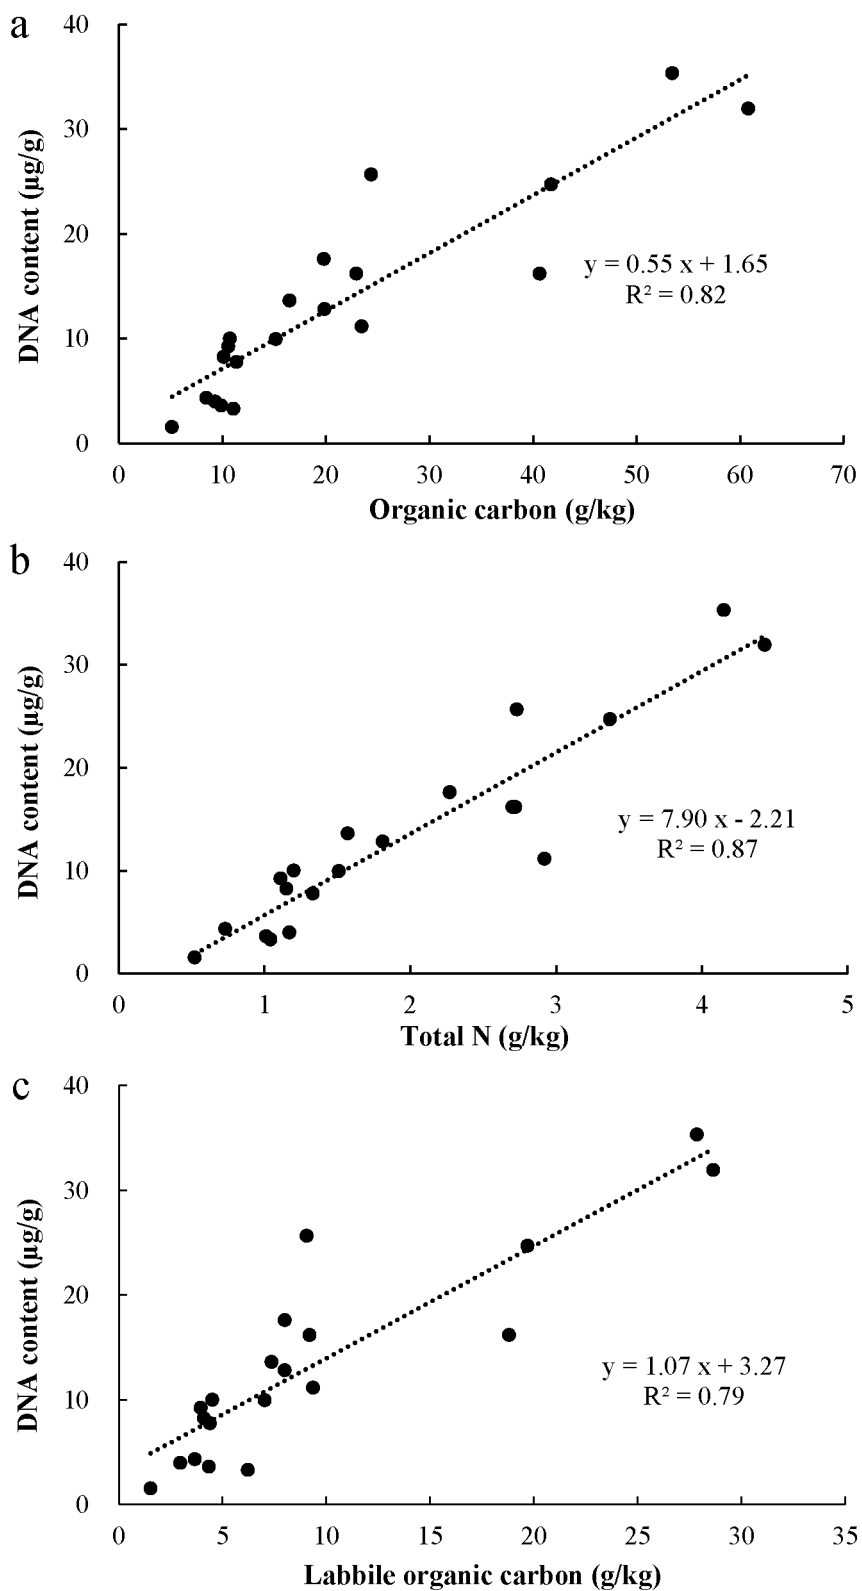

**Fig. S2.**

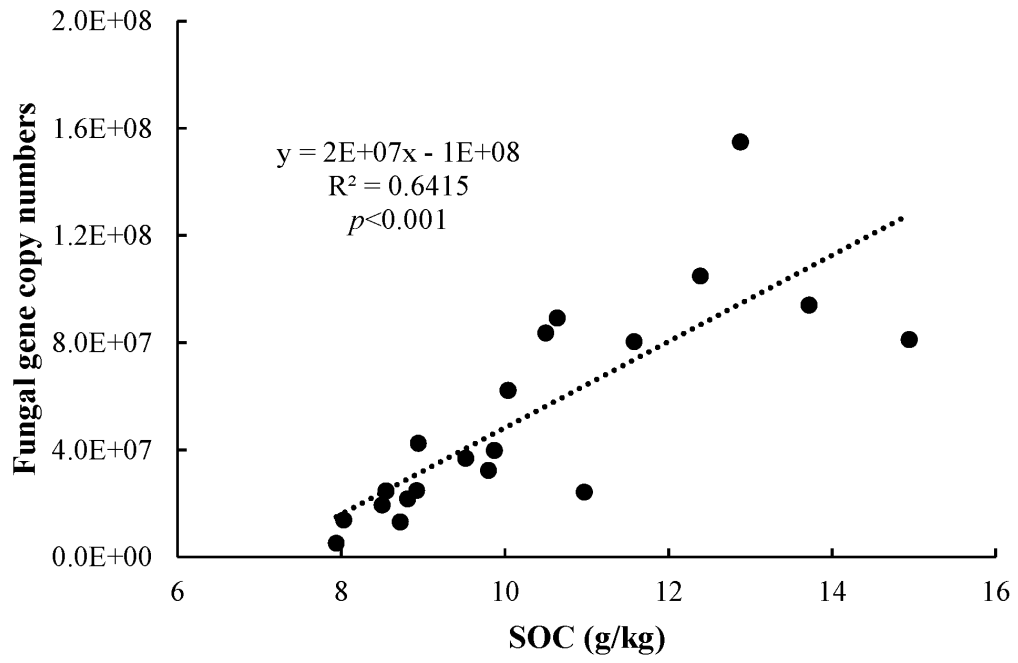

**Fig. S3.**

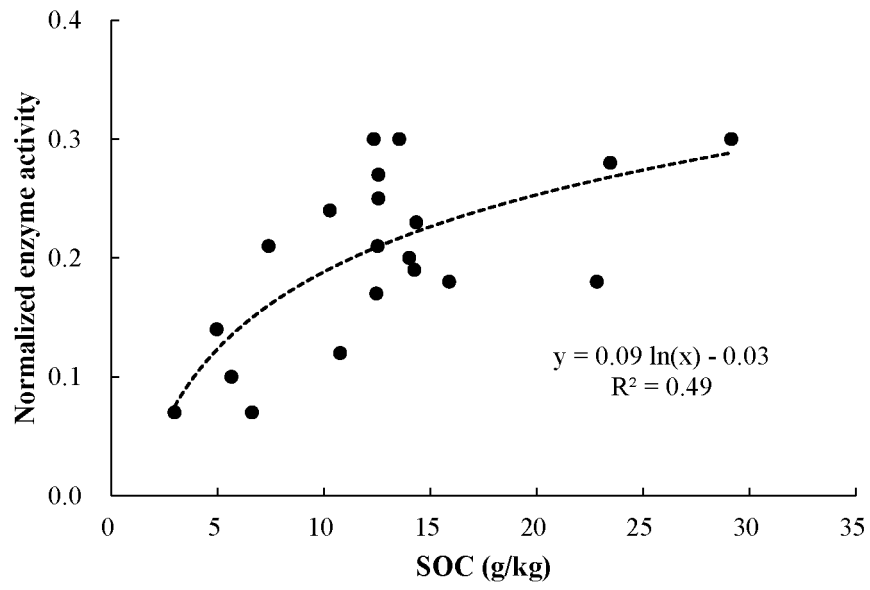

Fig. S4.

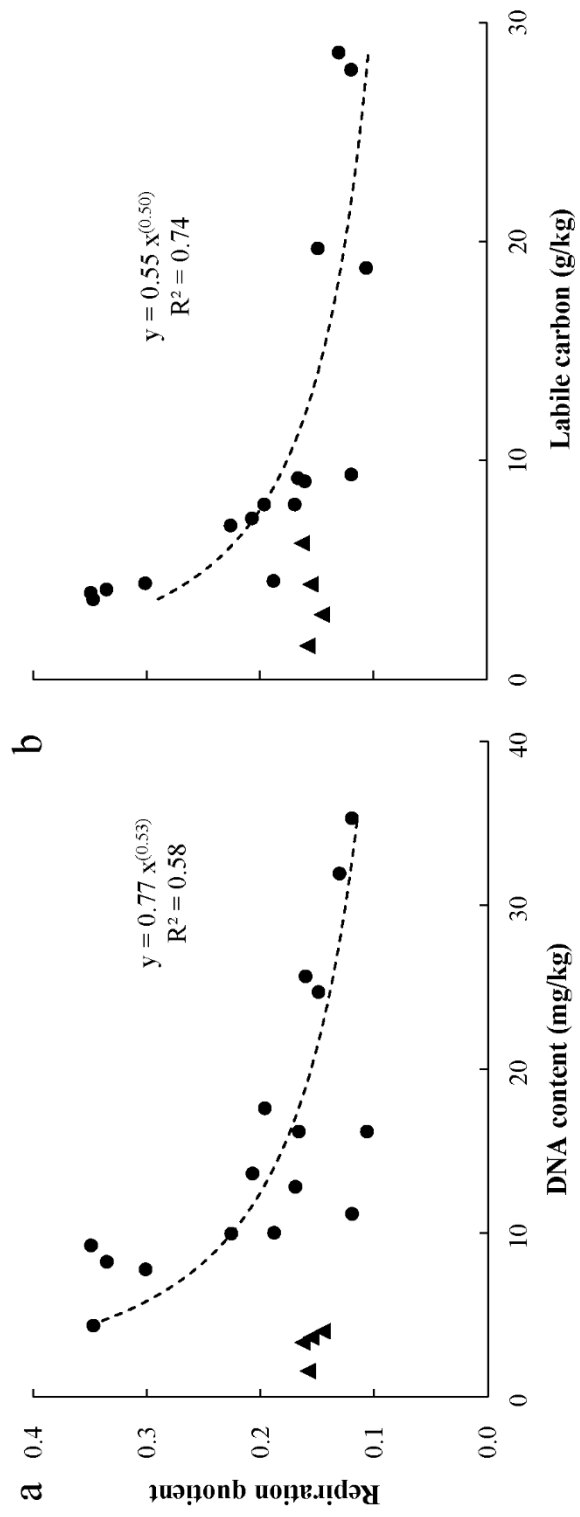

1 **Supplement Tables**

2 **Table S1.** Shannon diversity index of bacterial (BD), fungal (FD) and archaeal (ArD)  
 3 of soil size fraction of the studied chronosequence. Different capital and low case  
 4 letters in a single column indicate a significant ( $p < 0.05$ ) difference respectively  
 5 between fractions of a single soil, and between soils for a single fraction.

| Size fraction | Soil | BD              | FD             | ArD         |
|---------------|------|-----------------|----------------|-------------|
| Coarse sand   | P0   | 2.06±0.36 Abb   | 1.90±0.12 Ad   | 1.24±0.07Ab |
|               | P50  | 2.12±0.19 ABb   | 2.84±0.29 Aa   | 1.47±0.04Aa |
|               | P100 | 2.76±0.02 Aa    | 2.58±0.04 Aab  | 1.52±0.12Aa |
|               | P300 | 2.55±0.28 Aab   | 2.57±0.14 Aab  | 1.48±0.06Aa |
|               | P700 | 2.35±0.23 Ab    | 2.33±0.08 Abc  | 1.48±0.07Aa |
| Fine sand     | P0   | 1.09±0.42 Cd    | 1.97±0.21 Aa   | 1.29±0.02Ac |
|               | P50  | 2.27±0.60 ABabc | 1.93±0.20 Ba   | 1.23±0.02Bc |
|               | P100 | 2.74±0.23 Aa    | 1.99±0.14 Ba   | 1.62±0.04Aa |
|               | P300 | 2.10±0.09 Bb    | 1.72±0.21Bac   | 1.41±0.03Ab |
|               | P700 | 1.75±0.12 Bc    | 1.80±0.06 Ba   | 1.43±0.02Ab |
| Silt          | P0   | 1.76±0.07 Bd    | 1.02±0.16 Bcd  | 1.21±0.03Ab |
|               | P50  | 1.94±0.18 Bcd   | 2.05±0.20 Ba   | 1.40±0.03Aa |
|               | P100 | 2.54±0.14 Aa    | 1.12±0.24 Ccd  | 1.50±0.05Aa |
|               | P300 | 1.98±0.11 Bc    | 1.60±0.17 Bb   | 1.42±0.03Aa |
|               | P700 | 2.25±0.12 Ab    | 1.29±0.29 Cabc | 1.47±0.02Aa |
| Clay          | P0   | 1.93±0.06 Ac    | 0.64±0.01 Cb   | 1.39±0.12Aa |
|               | P50  | 2.44±0.10 Aab   | 1.31±0.48 Ca   | 1.44±0.06Aa |
|               | P100 | 2.65±0.15 Aa    | 1.34±0.63 BCa  | 1.53±0.11Aa |
|               | P300 | 2.33±0.11 Ab    | 1.54±0.25 Ba   | 1.58±0.12Aa |
|               | P700 | 2.57±0.22 Aab   | 1.13±0.15 Cab  | 1.48±0.06Aa |

7 **Table S2** Activity of invertase, urease, acid phosphatase,  $\beta$ -glucosidase,  $\beta$ -cellobiosidase and peroxidase in particle size fractions of soils over

8 the chronosequence

| Size fraction | Soil | Invertase         | Urease          | Acid phosphatase    | $\beta$ -glucosidase | $\beta$ -cellobiosidase | Peroxidase      |
|---------------|------|-------------------|-----------------|---------------------|----------------------|-------------------------|-----------------|
| Coarse sand   | P0   | 66.01 $\pm$ 1.97  | 0.34 $\pm$ 0.19 | 0.0546 $\pm$ 0.0020 | 12.16 $\pm$ 2.70     | 2.28 $\pm$ 1.46         | 1.22 $\pm$ 0.43 |
|               | P50  | 141.47 $\pm$ 1.48 | 0.90 $\pm$ 0.18 | 0.1689 $\pm$ 0.0030 | 262.12 $\pm$ 12.90   | 48.78 $\pm$ 5.45        | 1.47 $\pm$ 0.28 |
|               | P100 | 97.83 $\pm$ 1.68  | 0.68 $\pm$ 0.20 | 0.0873 $\pm$ 0.0014 | 151.19 $\pm$ 18.81   | 41.88 $\pm$ 5.36        | 2.90 $\pm$ 0.52 |
|               | P300 | 113.29 $\pm$ 2.57 | 0.58 $\pm$ 0.01 | 0.0735 $\pm$ 0.0007 | 170.24 $\pm$ 25.41   | 30.49 $\pm$ 5.87        | 3.81 $\pm$ 0.74 |
|               | P700 | 127.55 $\pm$ 2.96 | 1.06 $\pm$ 0.05 | 0.1414 $\pm$ 0.0130 | 370.78 $\pm$ 28.84   | 113.52 $\pm$ 9.93       | 5.12 $\pm$ 0.98 |
|               | P0   | 4.87 $\pm$ 0.20   | 0.55 $\pm$ 0.01 | 0.0238 $\pm$ 0.0012 | 26.13 $\pm$ 3.40     | 2.29 $\pm$ 0.59         | 1.15 $\pm$ 0.34 |
|               | P50  | 7.47 $\pm$ 1.42   | 0.67 $\pm$ 0.02 | 0.0268 $\pm$ 0.0009 | 29.32 $\pm$ 4.49     | 2.12 $\pm$ 0.70         | 1.92 $\pm$ 0.32 |
| Fine sand     | P100 | 7.44 $\pm$ 2.25   | 0.71 $\pm$ 0.11 | 0.0492 $\pm$ 0.0045 | 68.57 $\pm$ 11.04    | 10.65 $\pm$ 0.86        | 2.68 $\pm$ 0.44 |
|               | P300 | 15.61 $\pm$ 2.37  | 1.11 $\pm$ 0.05 | 0.0522 $\pm$ 0.0087 | 80.07 $\pm$ 10.16    | 12.84 $\pm$ 1.12        | 2.79 $\pm$ 0.51 |
|               | P700 | 18.78 $\pm$ 0.96  | 1.73 $\pm$ 0.02 | 0.0355 $\pm$ 0.0001 | 103.15 $\pm$ 7.49    | 10.47 $\pm$ 0.56        | 2.77 $\pm$ 0.40 |
|               | P0   | 3.48 $\pm$ 0.02   | 0.44 $\pm$ 0.01 | 0.0140 $\pm$ 0.0003 | 2.05 $\pm$ 0.35      | 1.75 $\pm$ 0.45         | 0.99 $\pm$ 0.28 |
|               | P50  | 7.31 $\pm$ 0.19   | 0.51 $\pm$ 0.20 | 0.0300 $\pm$ 0.0007 | 59.15 $\pm$ 3.96     | 4.97 $\pm$ 0.99         | 2.07 $\pm$ 0.3  |
|               | P100 | 7.31 $\pm$ 0.02   | 0.75 $\pm$ 0.01 | 0.0300 $\pm$ 0.0013 | 20.66 $\pm$ 3.20     | 0.49 $\pm$ 0.41         | 1.49 $\pm$ 0.14 |
|               | P300 | 6.14 $\pm$ 0.02   | 0.92 $\pm$ 0.05 | 0.0522 $\pm$ 0.0139 | 56.28 $\pm$ 5.23     | 4.69 $\pm$ 0.58         | 3.38 $\pm$ 0.42 |
| Silt          | P700 | 8.66 $\pm$ 0.97   | 1.38 $\pm$ 0.05 | 0.0326 $\pm$ 0.0009 | 61.476 $\pm$ 2.84    | 4.90 $\pm$ 1.05         | 4.94 $\pm$ 0.25 |
|               | P0   | 23.46 $\pm$ 0.64  | 0.98 $\pm$ 0.06 | 0.0362 $\pm$ 0.0040 | 6.06 $\pm$ 0.49      | 0.19 $\pm$ 0.06         | 1.46 $\pm$ 0.34 |
|               | P50  | 14.13 $\pm$ 2.67  | 1.31 $\pm$ 0.04 | 0.0582 $\pm$ 0.0004 | 31.14 $\pm$ 3.29     | 1.84 $\pm$ 0.37         | 2.50 $\pm$ 0.30 |
|               | P100 | 13.01 $\pm$ 0.99  | 0.61 $\pm$ 0.14 | 0.0730 $\pm$ 0.0032 | 30.29 $\pm$ 2.98     | 1.46 $\pm$ 0.55         | 2.22 $\pm$ 0.37 |
|               | P300 | 13.88 $\pm$ 0.35  | 1.12 $\pm$ 0.07 | 0.1023 $\pm$ 0.0058 | 37.63 $\pm$ 4.37     | 4.48 $\pm$ 0.72         | 2.89 $\pm$ 0.59 |
|               | P700 | 12.94 $\pm$ 3.36  | 1.88 $\pm$ 0.18 | 0.0653 $\pm$ 0.0018 | 32.64 $\pm$ 2.71     | 2.58 $\pm$ 0.36         | 3.82 $\pm$ 0.65 |
|               | Clay |                   |                 |                     |                      |                         |                 |

**Table S3** SOC and total DNA content scaled CO<sub>2</sub> production in particle size fractions of the chronosequence rice soils

| Soil                                              | Coarse sand | Fine sand    | Silt        | Clay         |
|---------------------------------------------------|-------------|--------------|-------------|--------------|
| CP/SOC (mgCO <sub>2</sub> -C g <sup>-1</sup> SOC) |             |              |             |              |
| P0                                                | 0.16±0.02Aa | 0.16±0.04Abc | 0.16±0.02Ac | 0.15±0.01Aa  |
| P50                                               | 0.12±0.04Ba | 0.35±0.04Aa  | 0.19±0.06Bc | 0.20±0.06Ba  |
| P100                                              | 0.15±0.03Ca | 0.21±0.01Bb  | 0.34±0.01Aa | 0.17±0.03BCa |
| P300                                              | 0.15±0.03Ca | 0.23±0.01Bb  | 0.31±0.01Ab | 0.12±0.02Ca  |
| P700                                              | 0.13±0.01Ca | 0.17±0.02Bc  | 0.35±0.02Aa | 0.16±0.02BCa |
| CP/DNA (mgCO <sub>2</sub> μg <sup>-1</sup> DNA)   |             |              |             |              |
| P0                                                | 2.00±0.21Aa | 1.56±0.45Ab  | 1.92±0.43Aa | 1.36±0.57Aa  |
| P50                                               | 0.66±0.23Bb | 2.48±0.33Aa  | 0.76±0.28Bb | 0.81±0.25Bab |
| P100                                              | 0.93±0.25Bb | 0.94±0.18Bbc | 1.51±0.08Aa | 0.86±0.17Bab |
| P300                                              | 0.98±0.19Bb | 1.26±0.09Bb  | 1.61±0.12Aa | 0.92±0.20Ba  |
| P700                                              | 0.91±0.05Bb | 0.96±0.11Bc  | 1.46±0.06Aa | 0.56±0.07Bb  |



**Table S4** Concentration of C4 ( $\text{g kg}^{-1}$ ) in particles and proportion of C4 in particle size fractions to total C4 (%) of the chronosequence paddy soils after incubation with maize carbon amendment

| Soil                | Coarse sand | Fine sand  | Silt       | Clay        |
|---------------------|-------------|------------|------------|-------------|
| Concentration of C4 |             |            |            |             |
| P0                  | 7.37±0.45a  | 1.27±0.11b | 1.00±0.06b | 3.98±0.54ab |
| P50                 | 3.49±0.34b  | 1.11±0.39b | 1.26±0.15b | 2.56±0.24c  |
| P100                | 2.96±0.22c  | 1.55±0.20b | 2.11±0.28a | 3.07±0.22c  |
| P300                | 2.53±0.41c  | 2.89±0.19a | 2.05±0.13a | 3.64±0.17b  |
| P700                | 2.41±0.18c  | 2.56±0.29a | 1.79±0.27a | 4.69±0.38a  |
| Proportion of C4    |             |            |            |             |
| P0                  | 10.59       | 48.85      | 16.42      | 24.13       |
| P50                 | 27.55       | 32.93      | 23.35      | 16.18       |
| P100                | 21.85       | 34.80      | 30.08      | 13.28       |
| P300                | 20.81       | 48.73      | 19.95      | 10.52       |
| P700                | 23.56       | 44.55      | 18.98      | 12.91       |
